# Supplementary material for: The development and validation of a nomogram for predicting brain metastases after chemotherapy and radiotherapy in male small cell lung cancer patients with stage III
Source: Aging (Albany NY). 2023 Jul 11;15(13):6487–502. doi: 10.18632/aging.204865 (PMC10373973; doi:10.18632/aging.204865)
Supplement: Supplementary Data Set [file aging-15-204865-s001.xls]

## Sheet: Sheet1
Supplementary Data Set
ID	Gender	Age	Tumor location	Smoke	Radiotherapy time (day)	RT dose	Cycle of chemotherapy before radiotherapy	CCRT	Total cycle of chemotherapy	PNI	PAR	PLR	NLR	SII	SIRI	LLR	dNLR	Brain metastases
1	1	1	1	1	1	2	2	1	1	1	1	2	2	2	1	2	1	1
2	1	1	2	1	1	2	1	0	2	2	2	1	1	1	2	1	1	0
3	1	1	2	0	1	2	1	1	2	2	1	2	2	2	2	2	2	0
4	1	1	1	1	1	2	2	1	2	2	2	2	2	2	1	2	2	0
5	1	1	2	1	1	2	2	0	2	2	2	2	2	2	1	2	2	0
6	1	1	1	1	1	2	1	0	2	2	2	2	2	2	2	2	2	0
7	1	2	2	1	1	2	1	0	1	2	1	2	2	2	2	2	2	1
8	1	2	1	1	1	2	1	0	1	2	2	2	1	2	2	2	1	0
9	1	1	1	0	1	2	2	1	2	2	2	2	2	2	1	2	2	1
10	1	1	1	0	1	2	2	1	1	2	2	2	2	2	1	2	2	0
11	1	2	1	0	1	2	2	0	1	1	2	2	2	2	2	2	2	0
12	1	1	1	1	1	1	2	0	2	2	2	2	2	2	1	2	2	0
13	1	1	1	0	1	1	2	0	2	2	2	2	2	2	2	2	2	1
14	1	1	1	0	1	2	1	0	2	2	2	2	2	2	2	2	2	0
15	1	1	1	1	1	1	2	1	1	2	2	2	1	2	2	2	1	0
16	1	1	1	1	1	1	2	1	2	2	2	2	1	1	2	2	2	0
17	1	1	1	1	1	2	1	0	1	1	2	1	1	1	2	1	1	1
18	1	2	2	1	1	1	1	0	1	2	1	2	2	2	2	2	2	0
19	1	1	2	1	1	1	2	1	2	2	2	2	2	2	1	2	2	0
20	1	1	2	1	1	2	1	0	2	2	2	1	2	2	2	2	2	1
21	1	2	1	1	2	2	1	0	2	1	2	2	2	2	2	2	2	0
22	1	1	2	1	1	1	1	0	1	1	1	1	1	2	1	1	1	1
23	1	2	2	1	1	2	1	0	1	2	1	2	2	2	2	2	2	0
24	1	1	1	0	1	2	1	0	2	2	2	2	2	2	2	2	2	1
25	1	1	1	0	1	2	1	0	2	2	2	2	2	2	2	2	2	0
26	1	2	1	1	2	2	1	0	2	2	2	2	2	2	2	2	2	0
27	1	1	1	1	1	2	1	1	1	2	2	1	2	2	2	2	2	0
28	1	1	1	1	1	2	2	0	2	2	1	2	1	2	2	1	1	0
29	1	1	1	0	1	1	1	0	1	1	2	2	1	1	2	1	1	1
30	1	1	1	1	1	2	2	0	1	2	2	2	2	2	1	2	2	1
31	1	1	2	1	1	2	2	1	2	2	2	2	2	2	2	2	2	0
32	1	1	1	1	1	2	2	1	2	2	2	2	1	2	2	2	2	0
33	1	2	1	1	1	2	2	1	1	2	2	2	1	2	2	2	1	0
34	1	1	1	1	1	1	1	1	2	2	2	2	2	2	2	2	2	0
35	1	1	1	1	1	1	1	0	1	2	2	2	1	1	2	1	1	1
36	1	1	1	1	1	2	2	1	2	2	2	2	2	2	1	2	2	1
37	1	1	2	1	1	2	2	1	2	2	2	2	2	2	1	2	2	0
38	1	2	1	1	1	2	2	0	1	1	2	1	1	1	1	1	1	1
39	1	1	2	1	1	1	1	0	1	2	2	2	2	2	2	2	2	0
40	1	1	2	1	1	2	1	1	2	2	2	2	1	2	2	2	2	0
41	1	1	1	0	1	2	2	1	1	2	2	2	2	2	2	2	2	0
42	1	2	1	1	1	2	1	1	1	1	2	2	1	2	1	2	1	0
43	1	1	2	1	1	2	2	1	2	2	2	2	1	2	2	2	2	0
44	1	1	2	1	1	2	1	0	1	1	2	1	1	2	2	2	2	1
45	1	1	2	0	1	1	2	1	2	1	2	1	1	1	2	1	1	1
46	1	1	2	1	1	2	2	0	2	2	2	2	2	2	1	2	2	0
47	1	1	2	1	1	2	1	0	1	2	2	2	2	2	2	2	2	0
48	1	1	1	0	1	1	2	0	1	1	2	1	1	1	2	1	1	1
49	1	1	2	1	1	1	1	0	2	2	2	2	2	2	2	2	2	0
50	1	1	1	1	1	1	1	0	2	2	2	1	1	1	2	1	1	0
51	1	1	2	1	1	2	2	1	2	2	2	2	2	2	2	2	2	0
52	1	2	2	0	1	2	2	1	2	2	2	2	2	2	2	2	2	0
53	1	1	2	0	1	2	2	1	1	2	1	1	1	1	2	1	1	0
54	1	1	1	1	1	2	2	1	1	2	2	2	2	2	1	2	2	0
55	1	1	2	0	1	1	2	1	2	2	2	2	2	2	2	2	2	0
56	1	1	1	0	1	2	2	1	2	1	2	2	2	2	2	2	2	0
57	1	1	1	1	1	1	1	0	2	1	1	2	1	2	2	2	1	1
58	1	1	1	0	1	2	1	0	1	2	2	2	2	2	2	2	2	0
59	1	1	2	0	1	1	1	1	2	2	2	2	2	2	2	2	2	0
60	1	2	1	0	1	2	1	1	2	2	2	2	1	1	2	1	1	0
61	1	1	2	1	1	2	1	0	2	2	1	2	2	2	2	2	2	0
62	1	1	2	0	1	2	2	0	1	2	2	2	2	2	2	2	2	0
63	1	1	2	0	1	1	1	0	1	2	2	2	2	2	1	2	2	1
64	1	2	1	0	1	2	1	0	2	2	2	2	2	2	2	2	2	0
65	1	1	2	0	1	1	2	0	2	2	2	1	2	2	2	2	2	0
66	1	1	1	0	2	2	1	0	1	1	2	2	1	2	2	2	2	0
67	1	2	1	1	1	2	1	0	2	2	2	2	2	2	2	2	2	0
68	1	1	1	1	1	1	2	0	2	2	2	2	2	2	2	2	2	1
69	1	1	2	0	1	2	2	1	2	2	2	2	2	2	2	2	2	0
70	1	1	2	0	2	2	2	1	2	1	2	1	1	1	2	1	1	0
71	1	1	1	0	1	2	2	1	2	1	1	1	1	2	2	1	1	0
72	1	2	1	1	1	2	2	1	2	2	1	2	2	2	1	2	2	0
73	1	1	1	0	2	2	2	0	2	2	1	2	2	2	2	2	2	0
74	1	1	2	1	1	2	1	0	1	2	1	2	1	2	2	2	2	0
75	1	2	1	0	1	1	1	0	2	2	2	1	2	2	2	2	2	0
76	1	1	2	0	2	2	2	0	2	2	2	1	2	2	2	2	2	0
77	1	2	2	0	1	1	2	1	1	2	1	2	2	2	1	2	2	0
78	1	1	1	1	1	1	1	0	2	2	1	2	1	1	2	1	1	0
79	1	1	1	1	1	1	1	1	2	1	1	2	1	2	2	1	1	1
80	1	1	1	1	1	1	2	0	2	2	2	2	2	2	2	2	2	0
81	1	1	1	1	1	1	2	1	2	2	1	2	2	2	1	2	2	0
82	1	1	1	0	1	2	2	1	1	2	2	2	2	2	2	2	2	0
83	1	2	1	0	1	2	2	0	2	2	2	1	1	1	2	2	1	1
84	1	1	1	0	1	2	1	1	1	2	2	2	2	2	2	2	2	0
85	1	1	2	1	1	2	2	1	1	2	2	2	2	2	2	2	2	0
86	1	1	1	0	1	1	1	0	2	2	2	2	2	2	2	2	2	0
87	1	1	1	0	1	1	1	0	2	2	2	2	2	2	2	2	2	0
88	1	1	2	1	2	2	2	0	1	2	2	2	2	2	2	2	2	0
89	1	1	1	1	1	2	1	1	1	2	2	1	1	1	2	1	1	0
90	1	1	2	1	1	2	1	0	1	2	2	1	1	1	2	1	1	0
91	1	1	1	1	1	2	1	0	2	2	2	1	1	1	2	1	1	0
92	1	1	2	1	1	2	1	1	2	2	2	2	2	2	1	2	2	0
93	1	1	1	0	1	1	1	0	1	2	2	1	2	2	2	2	2	1
94	1	1	1	1	1	2	2	1	2	2	2	1	2	2	2	2	2	0
95	1	1	2	1	1	1	1	0	1	2	2	2	1	1	2	1	1	1
96	1	1	1	1	1	1	1	0	2	2	1	2	2	2	2	2	2	1
97	1	1	2	0	1	1	2	1	1	2	2	2	2	2	2	2	2	0
98	1	1	1	0	2	2	2	0	1	1	2	1	2	2	1	2	2	0
99	1	1	1	0	1	1	1	0	2	2	2	2	1	2	2	1	1	1
100	1	1	1	0	1	2	1	1	2	2	2	2	1	2	1	2	1	0
101	1	1	1	0	1	2	2	1	2	2	2	2	2	2	2	2	2	0
102	1	1	1	1	1	1	1	0	1	2	2	2	2	2	2	2	1	0
103	1	1	2	0	1	2	2	1	2	2	2	2	2	2	1	2	2	0
104	1	1	1	1	1	1	2	1	2	2	1	2	1	2	2	1	1	0
105	1	1	2	1	1	2	1	0	1	2	2	2	2	2	2	2	2	0
106	1	1	2	1	1	1	2	1	2	2	2	2	2	2	2	2	2	1
107	1	1	1	1	1	1	1	1	2	2	2	2	1	1	2	1	1	0
108	1	2	1	1	1	2	1	1	2	2	2	2	1	2	2	2	1	0
109	1	1	1	1	1	2	1	1	2	2	2	1	2	2	2	2	2	0
110	1	1	2	1	1	1	1	1	2	2	2	2	2	2	2	2	2	0
111	1	1	2	1	1	1	2	1	1	2	1	2	2	2	1	2	2	1
112	1	1	1	1	2	2	1	0	2	2	2	2	1	2	2	2	1	1
